# Supplementary material for: Proteomic analysis of prognostic plasma biomarkers in peripheral arterial occlusive disease
Source: Royal Society of Chemistry journal article supplement (doi:10.1039/c7mb00229g), 2017-05-10
Supplement: c7mb00229g1.zip [file c7mb00229g1.zip]

| Master No. | Swiss-prot No. | Protein name                | pI   | MW    | No. Match. Peptides | Cov. (%) | Score  | Subcellular location | Functional ontology   | Poor / Well Av.Ratio: | Poor / Well T-test | Matched peptides with top score                     |
|------------|----------------|-----------------------------|------|-------|---------------------|----------|--------|----------------------|-----------------------|-----------------------|--------------------|-----------------------------------------------------|
| 620        | P02763         | Alpha-1-acid glycoprotein 1 | 4.93 | 23725 | 9/49                | 29%      | 107/56 | Secreted             | Transport             | 1.94                  | 0.017              | K.WFYIASAFR.N<br>K.TEDTIFLR.E                       |
| 629        | P02763         | Alpha-1-acid glycoprotein 1 | 4.93 | 23725 | 13/59               | 51%      | 147/56 | Secreted             | Transport             | 1.86                  | 0.00094            | K.WFYIASAFR.N<br>K.TEDTIFLR.E                       |
| 652        | P02763         | Alpha-1-acid glycoprotein 1 | 4.93 | 23725 | 12/51               | 40%      | 148/56 | Secreted             | Transport             | 1.88                  | 0.00066            | K.WFYIASAFR.N<br>K.TEDTIFLR.E                       |
| 656        | P02763         | Alpha-1-acid glycoprotein 1 | 4.93 | 23725 | 13/52               | 48%      | 140/56 | Secreted             | Transport             | 1.94                  | 0.0022             | K.WFYIASAFR.N<br>K.TEDTIFLR.E                       |
| 674        | P02763         | Alpha-1-acid glycoprotein 1 | 4.93 | 23725 | 13/59               | 40%      | 130/56 | Secreted             | Transport             | 1.7                   | 0.017              | K.WFYIASAFR.N<br>K.TEDTIFLR.E                       |
| 681        | P02763         | Alpha-1-acid glycoprotein 1 | 4.93 | 23725 | 11/65               | 47%      | 127/56 | Secreted             | Transport             | 1.47                  | 0.033              | K.WFYIASAFR.N<br>K.TEDTIFLR.E                       |
| 668        | P19652         | Alpha-1-acid glycoprotein 2 | 5.03 | 23873 | 14/48               | 39%      | 141/56 | Secreted             | Transport             | 2.02                  | 0.00071            | K.WFYIASAFR.N<br>K.TEDTIFLR.E                       |
| 344        | P01011         | Alpha-1-antichymotrypsin    | 5.33 | 47792 | 17/56               | 32%      | 150/56 | Secreted             | Inflammatory response | 1.72                  | 0.0011             | K.EQLSLLDR.F<br>K.EQLSLLDR.F                        |
| 296        | P01011         | Alpha-1-antichymotrypsin    | 5.33 | 47792 | 19/56               | 30%      | 150/56 | Secreted             | Inflammatory response | 1.63                  | 0.035              | K.EQLSLLDR.F+Glu->pyro-Glu(N-termE)<br>K.EQLSLLDR.F |
| 334        | P01011         | Alpha-1-antichymotrypsin    | 5.33 | 47792 | 17/56               | 32%      | 150/56 | Secreted             | Inflammatory response | 1.47                  | 0.0096             | K.EQLSLLDR.F+Glu->pyro-Glu(N-termE)<br>K.EQLSLLDR.F |
| 338        | P01011         | Alpha-1-antichymotrypsin    | 5.33 | 47792 | 19/68               | 39%      | 150/56 | Secreted             | Inflammatory response | 1.75                  | 0.00035            | K.EQLSLLDR.F+Glu->pyro-Glu(N-termE)<br>K.EQLSLLDR.F |
| 350        | P01011         | Alpha-1-antichymotrypsin    | 5.33 | 47792 | 17/85               | 28%      | 127/56 | Secreted             | Inflammatory response | 1.53                  | 0.0019             | K.EQLSLLDR.F+Glu->pyro-Glu(N-termE)<br>K.EQLSLLDR.F |
| 358        | P01011         | Alpha-1-antichymotrypsin    | 5.33 | 47792 | 19/50               | 37%      | 153/56 | Secreted             | Inflammatory response | 1.65                  | 0.00065            | K.EQLSLLDR.F+Glu->pyro-Glu(N-termE)<br>K.EQLSLLDR.F |
| 378        | P01011         | Alpha-1-antichymotrypsin    | 5.33 | 47792 | 18/48               | 32%      | 152/56 | Secreted             | Inflammatory response | 1.42                  | 0.0018             | K.EQLSLLDR.F+Glu->pyro-Glu(N-termE)<br>K.EQLSLLDR.F |
| 277        | P01011         | Alpha-1-antichymotrypsin    | 5.33 | 47792 | 26/89               | 40%      | 203/56 | Secreted             | Inflammatory response | 1.47                  | 0.0016             | K.QLVLK.A<br>K.EQLSLLDR.F+Glu->pyro-Glu(N-termE)    |
| 377        | P01011         | Alpha-1-antichymotrypsin    | 5.33 | 47792 | 20/50               | 33%      | 190/56 | Secreted             | Inflammatory response | 1.38                  | 0.0083             | K.QLVLK.A<br>K.EQLSLLDR.F+Glu->pyro-Glu(N-termE)    |
| 505        | P01009         | Alpha-1-antitrypsin         | 5.37 | 46878 | 17/60               | 27%      | 124/56 | Secreted             | Inflammatory response | 1.32                  | 0.049              | K.FLEDVKK.L<br>K.KQINDYVEK.G                        |
| 459        | P01009         | Alpha-1-antitrypsin         | 5.37 | 46878 | 23/65               | 33%      | 180/56 | Secreted             | Inflammatory response | 2.14                  | 0.0011             | K.ITPNLAEFASFSLYR.Q<br>K.FLEDVKK.L                  |
| 284        | P01009         | Alpha-1-antitrypsin         | 5.37 | 46878 | 17/39               | 22%      | 125/56 | Secreted             | Inflammatory response | 1.42                  | 0.0062             | K.ITPNLAEFASFSLYR.Q<br>K.KQINDYVEK.G                |
| 461        | P01009         | Alpha-1-antitrypsin         | 5.37 | 46878 | 28/100              | 47%      | 223/56 | Secreted             | Inflammatory response | 2                     | 0.0067             | K.TDTSHHDQDHPFNF.K<br>K.FLEDVK.K                    |

|     |        |                                 |      |        |        |     |        |          |                       |       |           |                                                             |
|-----|--------|---------------------------------|------|--------|--------|-----|--------|----------|-----------------------|-------|-----------|-------------------------------------------------------------|
| 509 | P01009 | Alpha-1-antitrypsin             | 5.37 | 46878  | 29/81  | 47% | 202/56 | Secreted | Inflammatory response | 1.35  | 0.0069    | K.TDTSHHDQDHPTFNK.I<br>K.FLEDVKK.L                          |
| 507 | P01009 | Alpha-1-antitrypsin             | 5.37 | 46878  | 14/35  | 30% | 131/56 | Secreted | Inflammatory response | 1.86  | 0.016     | K.TDTSHHDQDHPTFNK.I<br>K.GKWERPFVEVK.D                      |
| 416 | P01009 | Alpha-1-antitrypsin             | 5.37 | 46878  | 30/100 | 63% | 284/56 | Secreted | Inflammatory response | 2.21  | 0.0015    | K.TDTSHHDQDHPTFNK.I<br>K.ITPNLAIEFAFSLYR.Q                  |
| 423 | P01009 | Alpha-1-antitrypsin             | 5.37 | 46878  | 32/90  | 54% | 270/56 | Secreted | Inflammatory response | 1.92  | 0.0014    | K.TDTSHHDQDHPTFNK.I<br>K.ITPNLAIEFAFSLYR.Q                  |
| 431 | P01009 | Alpha-1-antitrypsin             | 5.37 | 46878  | 29/88  | 54% | 238/56 | Secreted | Inflammatory response | 2.63  | 0.0000047 | K.TDTSHHDQDHPTFNK.I<br>K.ITPNLAIEFAFSLYR.Q                  |
| 434 | P01009 | Alpha-1-antitrypsin             | 5.37 | 46878  | 29/88  | 54% | 238/56 | Secreted | Inflammatory response | 2.48  | 0.000093  | K.TDTSHHDQDHPTFNK.I<br>K.ITPNLAIEFAFSLYR.Q                  |
| 462 | P01009 | Alpha-1-antitrypsin             | 5.37 | 46878  | 20/68  | 39% | 191/56 | Secreted | Inflammatory response | 2.24  | 0.00014   | K.TDTSHHDQDHPTFNK.I<br>K.ITPNLAIEFAFSLYR.Q                  |
| 466 | P01009 | Alpha-1-antitrypsin             | 5.37 | 46878  | 27/83  | 48% | 220/56 | Secreted | Inflammatory response | 2.02  | 0.000064  | K.TDTSHHDQDHPTFNK.I<br>K.ITPNLAIEFAFSLYR.Q                  |
| 483 | P01009 | Alpha-1-antitrypsin             | 5.37 | 46878  | 35/100 | 59% | 258/56 | Secreted | Inflammatory response | 1.94  | 0.00041   | K.TDTSHHDQDHPTFNK.I<br>K.ITPNLAIEFAFSLYR.Q                  |
| 542 | P01009 | Alpha-1-antitrypsin             | 5.37 | 46878  | 29/85  | 55% | 259/56 | Secreted | Inflammatory response | 2.5   | 0.013     | K.TDTSHHDQDHPTFNK.I<br>K.ITPNLAIEFAFSLYR.Q                  |
| 174 | P04217 | Alpha-1B-glycoprotein           | 5.56 | 54790  | 12/44  | 22% | 118/56 | Secreted | Inflammatory response | 1.88  | 0.0085    | K.HQFLTGTQGR.Y<br>R.SGLSTGWTQLSK.L                          |
| 239 | P04217 | Alpha-1B-glycoprotein           | 5.56 | 54790  | 13/44  | 26% | 135/56 | Secreted | Inflammatory response | 1.32  | 0.011     | K.HQFLTGTQGR.Y<br>R.SGLSTGWTQLSK.L                          |
| 240 | P04217 | Alpha-1B-glycoprotein           | 5.56 | 54790  | 15/43  | 34% | 187/56 | Secreted | Inflammatory response | 1.39  | 0.019     | K.HQFLTGTQGR.Y<br>R.SGLSTGWTQLSK.L                          |
| 241 | P04217 | Alpha-1B-glycoprotein           | 5.56 | 54790  | 13/43  | 36% | 165/56 | Secreted | Inflammatory response | 1.57  | 0.0076    | K.NGVAQEPVHLDSPAIK.H<br>K.HQFLTGTQGR.Y                      |
| 400 | P02765 | Alpha-2-HS-glycoprotein         | 5.43 | 40098  | 5/27   | 11% | 61/56  | Secreted | Inflammatory response | 2     | 0.019     | K.HTLNQIDEVK.V<br>K.EHAVEGDCDFQLLK.L                        |
| 404 | P02765 | Alpha-2-HS-glycoprotein         | 5.43 | 40098  | 11/47  | 22% | 74/56  | Secreted | Inflammatory response | 1.63  | 0.0037    | K.HTLNQIDEVK.V<br>K.EHAVEGDCDFQLLK.L+Glu->pyro-Glu(N-termE) |
| 619 | P06727 | Apolipoprotein A-IV             | 5.28 | 45371  | 31/92  | 58% | 237/56 | Secreted | Transport             | 1.46  | 0.018     | K.LGEVNTYAGDLQK.K<br>K.KLVFPFATELHER.L                      |
| 215 | P04003 | C4b-binding protein alpha chain | 7.15 | 69042  | 13/43  | 19% | 95/56  | Secreted | Inflammatory response | -1.41 | 0.033     | K.MAAWPFSR.L<br>K.YTCLPGYVR.S                               |
| 286 | P04003 | C4b-binding protein alpha chain | 7.15 | 69042  | 20/39  | 25% | 183/56 | Secreted | Inflammatory response | -1.55 | 0.04      | K.MAAWPFSR.L<br>R.FKTGTTLK.Y                                |
| 959 | P00450 | Ceruloplasmin                   | 5.44 | 122983 | 14/24  | 9%  | 111/56 | Secreted | Transport             | -1.35 | 0.045     | K.ALYLQYTDETR.T<br>K.VYVHLK.N                               |
| 762 | P10909 | Clusterin                       | 5.89 | 53031  | 14/60  | 21% | 61/56  | Secreted | Apoptosis             | 1.31  | 0.013     | K.EDALNETR.E+Glu->pyro-Glu(N-termE)<br>R.ASSIIDELFQDR.F     |

|     |        |                                          |      |       |        |     |        |          |                          |       |         |                                                                                |
|-----|--------|------------------------------------------|------|-------|--------|-----|--------|----------|--------------------------|-------|---------|--------------------------------------------------------------------------------|
| 744 | P10909 | Clusterin                                | 5.89 | 53031 | 12/58  | 26% | 76/56  | Secreted | Apoptosis                | 1.43  | 0.025   | K.QTCMKFYAR.V<br>R.QQTHMLDVMQDHF.SR.A+Gln->pyro-<br>Glu(N-termQ);2Oxidation(M) |
| 299 | P02746 | Complement C1q<br>subcomponent subunit B | 8.83 | 26933 | 13/58  | 38% | 120/56 | Secreted | Inflammatory<br>response | 1.67  | 0.00031 | K.GEKGLPGLAGDHGEFGEK.G<br>K.IAFSATR.T                                          |
| 982 | P02746 | Complement C1q<br>subcomponent subunit B | 8.83 | 26933 | 12/32  | 38% | 136/56 | Secreted | Inflammatory<br>response | -1.43 | 0.013   | K.GEKGLPGLAGDHGEFGEK.G<br>K.IAFSATR.T                                          |
| 131 | P09871 | Complement C1s<br>subcomponent           | 4.86 | 78174 | 25/84  | 27% | 170/56 | Secreted | Inflammatory<br>response | 1.35  | 0.0086  | R.LCGQR.S<br>K.LQVIFK.S                                                        |
| 257 | P02748 | Complement component C9                  | 5.43 | 64615 | 13/53  | 18% | 86/56  | Secreted | Inflammatory<br>response | 1.47  | 0.0099  | R.SIEVFGQFNGK.R<br>R.VVEESELAR.T                                               |
| 86  | P00751 | Complement factor B                      | 6.67 | 86847 | 33/74  | 28% | 233/56 | Secreted | Inflammatory<br>response | 1.61  | 0.0054  | R.STGSWSTLK.T<br>K.TQDQK.T                                                     |
| 98  | P00751 | Complement factor B                      | 6.67 | 86847 | 20/52  | 19% | 152/56 | Secreted | Inflammatory<br>response | 1.5   | 0.031   | R.STGSWSTLK.T<br>R.KVGSQYR.L                                                   |
| 106 | P00751 | Complement factor B                      | 6.67 | 86847 | 20/27  | 24% | 221/56 | Secreted | Inflammatory<br>response | 1.36  | 0.031   | R.STGSWSTLK.T<br>R.KVGSQYR.L                                                   |
| 73  | P00751 | Complement factor B                      | 6.67 | 86847 | 7/11   | 8%  | 74/56  | Secreted | Inflammatory<br>response | 1.45  | 0.03    | R.STGSWSTLK.T<br>R.TCQVNGR.W                                                   |
| 79  | P00751 | Complement factor B                      | 6.67 | 86847 | 20/56  | 21% | 131/56 | Secreted | Inflammatory<br>response | 1.55  | 0.023   | R.STGSWSTLK.T<br>R.TCQVNGR.W                                                   |
| 69  | P00751 | Complement factor B                      | 6.67 | 86847 | 13/44  | 12% | 78/56  | Secreted | Inflammatory<br>response | 1.82  | 0.045   | R.TCQVNGR.W<br>R.KVGSQYR.L                                                     |
| 76  | P00751 | Complement factor B                      | 6.67 | 86847 | 15/24  | 18% | 151/56 | Secreted | Inflammatory<br>response | 1.74  | 0.011   | R.TCQVNGR.W<br>R.KVGSQYR.L                                                     |
| 83  | P00751 | Complement factor B                      | 6.67 | 86847 | 29/63  | 28% | 232/56 | Secreted | Inflammatory<br>response | 1.39  | 0.028   | R.STGSWSTLK.T<br>K.TQDQK.T                                                     |
| 912 | P36980 | Complement factor H-related<br>protein 2 | 6    | 31543 | 5/25   | 14% | 58/56  | Secreted | Inflammatory<br>response | 2.16  | 0.044   | K.SFWTR.I<br>R.ITCAEEGWSPTPK.C                                                 |
| 984 | Q7L5A8 | Fatty acid 2-hydroxylase                 | 8.76 | 42935 | 8/49   | 22% | 63/56  | Secreted | Lipid metabolism         | -1.56 | 0.0019  | MAPAPPPAASFSPSEVQR.R+Acetyl<br>M.APAPPPAASFSPSEVQRR.L                          |
| 256 | P02671 | Fibrinogen alpha chain                   | 5.7  | 95656 | 31/94  | 29% | 166/56 | Secreted | Coagulation              | 1.64  | 0.0017  | K.CPSGCR.M<br>K.GLIDEVNQDFTNR.I                                                |
| 320 | P02671 | Fibrinogen alpha chain                   | 5.7  | 95656 | 27/72  | 25% | 155/56 | Secreted | Coagulation              | 1.62  | 0.0086  | K.CPSGCR.M<br>K.GLIDEVNQDFTNR.I                                                |
| 321 | P02671 | Fibrinogen alpha chain                   | 5.7  | 95656 | 46/100 | 33% | 225/56 | Secreted | Coagulation              | 1.58  | 0.0058  | K.CPSGCR.M<br>K.GLIDEVNQDFTNR.I                                                |
| 337 | P02671 | Fibrinogen alpha chain                   | 5.7  | 95656 | 32/86  | 27% | 169/56 | Secreted | Coagulation              | 1.58  | 0.0054  | K.CPSGCR.M<br>K.GLIDEVNQDFTNR.I                                                |
| 272 | P02671 | Fibrinogen alpha chain                   | 5.7  | 95656 | 29/58  | 25% | 177/56 | Secreted | Coagulation              | 1.43  | 0.034   | K.GLIDEVNQDFTNR.I<br>K.NSLFEYQK.N                                              |
| 308 | P02671 | Fibrinogen alpha chain                   | 5.7  | 95656 | 33/82  | 28% | 169/56 | Secreted | Coagulation              | 1.47  | 0.036   | K.GLIDEVNQDFTNR.I<br>K.NSLFEYQK.N                                              |
| 322 | P02671 | Fibrinogen alpha chain                   | 5.7  | 95656 | 12/53  | 12% | 64/56  | Secreted | Coagulation              | 1.48  | 0.013   | K.NSLFEYQK.N<br>R.GDFSSANNR.D                                                  |

|     |        |                        |      |       |        |     |        |          |             |       |         |                                        |
|-----|--------|------------------------|------|-------|--------|-----|--------|----------|-------------|-------|---------|----------------------------------------|
| 315 | P02671 | Fibrinogen alpha chain | 5.7  | 95656 | 39/91  | 33% | 218/56 | Secreted | Coagulation | 1.42  | 0.017   | R.HQSACK.D<br>K.CPSGCR.M               |
| 330 | P02671 | Fibrinogen alpha chain | 5.7  | 95656 | 43/100 | 32% | 229/56 | Secreted | Coagulation | 1.53  | 0.003   | R.HQSACK.D<br>K.CPSGCR.M               |
| 332 | P02671 | Fibrinogen alpha chain | 5.7  | 95656 | 41/100 | 31% | 208/56 | Secreted | Coagulation | 1.61  | 0.0015  | R.HQSACK.D<br>K.CPSGCR.M               |
| 335 | P02671 | Fibrinogen alpha chain | 5.7  | 95656 | 40/99  | 29% | 181/56 | Secreted | Coagulation | 1.52  | 0.0054  | R.HQSACK.D<br>K.CPSGCR.M               |
| 336 | P02671 | Fibrinogen alpha chain | 5.7  | 95656 | 41/96  | 35% | 217/56 | Secreted | Coagulation | 1.51  | 0.01    | R.HQSACK.D<br>K.CPSGCR.M               |
| 307 | P02671 | Fibrinogen alpha chain | 5.7  | 95656 | 41/91  | 33% | 210/56 | Secreted | Coagulation | 1.51  | 0.02    | R.HQSACK.D<br>K.DSDWPFCSDEDWNYK.C      |
| 726 | P02671 | Fibrinogen alpha chain | 5.7  | 95656 | 43/100 | 33% | 216/56 | Secreted | Coagulation | 1.45  | 0.026   | R.HQSACK.D<br>K.DSDWPFCSDEDWNYK.C      |
| 511 | P02675 | Fibrinogen beta chain  | 8.54 | 56577 | 20/59  | 25% | 126/56 | Secreted | Coagulation | -2.26 | 0.023   | K.AAATQKK.V<br>K.DLWQK.R               |
| 528 | P02675 | Fibrinogen beta chain  | 8.54 | 56577 | 10/30  | 14% | 72/56  | Secreted | Coagulation | -2.79 | 0.012   | K.AAATQKK.V<br>K.DLWQK.R               |
| 607 | P02675 | Fibrinogen beta chain  | 8.54 | 56577 | 27/77  | 45% | 181/56 | Secreted | Coagulation | -1.52 | 0.029   | K.AAATQKK.V<br>K.DLWQK.R               |
| 883 | P02675 | Fibrinogen beta chain  | 8.54 | 56577 | 27/77  | 41% | 180/56 | Secreted | Coagulation | 1.36  | 0.029   | K.DLWQK.R<br>K.DNENVVNEYSSELEK.H       |
| 516 | P02675 | Fibrinogen beta chain  | 8.54 | 56577 | 24/59  | 36% | 157/56 | Secreted | Coagulation | -3.08 | 0.00011 | K.DLWQKR.Q<br>K.HQLYIDETVNSNIPTNLR.V   |
| 519 | P02675 | Fibrinogen beta chain  | 8.54 | 56577 | 14/31  | 25% | 109/56 | Secreted | Coagulation | -3.34 | 0.00011 | R.EEAPSLRPAPPPISGGGYR.A<br>K.DLWQK.R   |
| 520 | P02675 | Fibrinogen beta chain  | 8.54 | 56577 | 26/100 | 39% | 151/56 | Secreted | Coagulation | -3.36 | 0.00019 | R.EEAPSLRPAPPPISGGGYR.A<br>K.DLWQK.R   |
| 556 | P02675 | Fibrinogen beta chain  | 8.54 | 56577 | 24/64  | 36% | 184/56 | Secreted | Coagulation | -2.71 | 0.027   | R.GHRPLDK.K<br>K.AAATQKK.V             |
| 375 | P02675 | Fibrinogen beta chain  | 8.54 | 56577 | 21/52  | 34% | 161/56 | Secreted | Coagulation | -1.43 | 0.026   | R.GHRPLDK.K<br>K.DLWQK.R               |
| 522 | P02675 | Fibrinogen beta chain  | 8.54 | 56577 | 21/71  | 28% | 151/56 | Secreted | Coagulation | -2.35 | 0.0052  | R.GHRPLDK.K<br>K.DLWQK.R               |
| 539 | P02675 | Fibrinogen beta chain  | 8.54 | 56577 | 25/81  | 38% | 177/56 | Secreted | Coagulation | -2.95 | 0.00043 | R.GHRPLDK.K<br>K.DLWQK.R               |
| 515 | P02675 | Fibrinogen beta chain  | 8.54 | 56577 | 25/84  | 38% | 174/56 | Secreted | Coagulation | -3.27 | 0.018   | R.GHRPLDK.K<br>R.EEAPSLRPAPPPISGGGYR.A |
| 524 | P02675 | Fibrinogen beta chain  | 8.54 | 56577 | 28/77  | 49% | 183/56 | Secreted | Coagulation | -3.08 | 0.002   | R.GHRPLDK.K<br>R.EEAPSLRPAPPPISGGGYR.A |
| 536 | P02675 | Fibrinogen beta chain  | 8.54 | 56577 | 28/64  | 49% | 230/56 | Secreted | Coagulation | -3.17 | 0.00021 | R.GHRPLDK.K<br>R.EEAPSLRPAPPPISGGGYR.A |
| 575 | P02675 | Fibrinogen beta chain  | 8.54 | 56577 | 20/61  | 35% | 140/56 | Secreted | Coagulation | -2.95 | 0.016   | R.GHRPLDK.K<br>R.EEAPSLRPAPPPISGGGYR.A |

|      |        |                        |      |       |       |     |        |          |                       |      |           |                                                              |
|------|--------|------------------------|------|-------|-------|-----|--------|----------|-----------------------|------|-----------|--------------------------------------------------------------|
| 410  | P02675 | Fibrinogen beta chain  | 8.54 | 56577 | 28/83 | 47% | 192/56 | Secreted | Coagulation           | 1.39 | 0.019     | R.EEAPSLRPAPPISGGGYR.A+Glu->pyro-Glu(N-termE)<br>R.GHRPLDK.K |
| 442  | P02675 | Fibrinogen beta chain  | 8.54 | 56577 | 37/86 | 51% | 239/56 | Secreted | Coagulation           | 1.33 | 0.0025    | R.EEAPSLRPAPPISGGGYR.A+Glu->pyro-Glu(N-termE)<br>R.GHRPLDK.K |
| 447  | P02675 | Fibrinogen beta chain  | 8.54 | 56577 | 29/88 | 49% | 206/56 | Secreted | Coagulation           | 1.46 | 0.012     | R.EEAPSLRPAPPISGGGYR.A+Glu->pyro-Glu(N-termE)<br>R.GHRPLDK.K |
| 1200 | P02675 | Fibrinogen beta chain  | 8.54 | 56577 | 14/28 | 20% | 104/56 | Secreted | Coagulation           | 1.48 | 0.0053    | R.SILENLR.S<br>K.ECEEIIR.K+Glu->pyro-Glu(N-termE)            |
| 506  | P02679 | Fibrinogen gamma chain | 5.37 | 52106 | 10/43 | 13% | 77/56  | Secreted | Coagulation           | 2.91 | 0.048     | M.SWSLHPR.N+Acetyl(ProteinN-term)<br>R.DNCCILDER.F           |
| 1197 | P02679 | Fibrinogen gamma chain | 5.37 | 52106 | 21/62 | 42% | 124/56 | Secreted | Coagulation           | 1.47 | 0.0023    | R.DNCCILDER.F<br>K.AIQLTYNPDESSKPNMIDAATLK.S                 |
| 490  | P02679 | Fibrinogen gamma chain | 5.37 | 52106 | 21/60 | 33% | 174/56 | Secreted | Coagulation           | 1.39 | 0.017     | R.DNCCILDER.F<br>K.YEASILTHDSSIR.Y                           |
| 558  | P02679 | Fibrinogen gamma chain | 5.37 | 52106 | 10/25 | 23% | 110/56 | Secreted | Coagulation           | 1.4  | 0.0018    | R.DNCCILDER.F<br>K.YEASILTHDSSIR.Y                           |
| 491  | P02679 | Fibrinogen gamma chain | 5.37 | 52106 | 14/49 | 35% | 127/56 | Secreted | Coagulation           | 1.53 | 0.024     | R.DNCCILDER.F<br>R.FGSYCPTTCGIADFLSTYQTK.V                   |
| 644  | P00738 | Haptoglobin            | 6.13 | 45861 | 23/63 | 33% | 193/56 | Secreted | Inflammatory response | 7.86 | 0.0000096 | K.GSFPWQAK.M<br>K.DIAPTLTLYVGK.K                             |
| 735  | P00738 | Haptoglobin            | 6.13 | 45861 | 18/54 | 29% | 166/56 | Secreted | Inflammatory response | 3.45 | 0.000097  | K.GSFPWQAK.M<br>K.DIAPTLTLYVGK.K                             |
| 745  | P00738 | Haptoglobin            | 6.13 | 45861 | 14/56 | 29% | 113/56 | Secreted | Inflammatory response | 1.93 | 0.0006    | K.GSFPWQAK.M<br>K.DIAPTLTLYVGK.K                             |
| 753  | P00738 | Haptoglobin            | 6.13 | 45861 | 14/45 | 34% | 128/56 | Secreted | Inflammatory response | 2.75 | 0.0036    | K.GSFPWQAK.M<br>K.DIAPTLTLYVGK.K                             |
| 761  | P00738 | Haptoglobin            | 6.13 | 45861 | 15/39 | 31% | 178/56 | Secreted | Inflammatory response | 1.33 | 0.0098    | K.GSFPWQAK.M<br>K.DIAPTLTLYVGK.K                             |
| 635  | P00738 | Haptoglobin            | 6.13 | 45861 | 6/11  | 14% | 78/56  | Secreted | Inflammatory response | 3.96 | 0.00013   | K.GSFPWQAK.M<br>K.DYAEVGR.V                                  |
| 677  | P00738 | Haptoglobin            | 6.13 | 45861 | 5/18  | 8%  | 60/56  | Secreted | Inflammatory response | 2.02 | 0.014     | K.GSFPWQAK.M<br>K.VSVNER.V                                   |
| 1122 | P00738 | Haptoglobin            | 6.13 | 45861 | 10/46 | 17% | 90/56  | Secreted | Inflammatory response | 1.52 | 0.0093    | K.LRTEGDGVYTLNDK.K<br>R.TEGDGVYTLNDK.K                       |
| 1134 | P00738 | Haptoglobin            | 6.13 | 45861 | 11/38 | 22% | 103/56 | Secreted | Inflammatory response | 1.33 | 0.045     | K.LRTEGDGVYTLNDK.K<br>R.TEGDGVYTLNDK.K                       |
| 1139 | P00738 | Haptoglobin            | 6.13 | 45861 | 6/19  | 12% | 80/56  | Secreted | Inflammatory response | 1.3  | 0.04      | K.LRTEGDGVYTLNDK.K<br>R.TEGDGVYTLNDK.K                       |
| 1130 | P00738 | Haptoglobin            | 6.13 | 45861 | 8/20  | 12% | 80/56  | Secreted | Inflammatory response | 1.41 | 0.0055    | K.LRTEGDGVYTLNDK.K<br>R.YQCK.N                               |
| 623  | P00738 | Haptoglobin            | 6.13 | 45861 | 12/26 | 24% | 138/56 | Secreted | Inflammatory response | 9.99 | 0.000026  | K.LRTEGDGVYTLNNEK.Q<br>K.GSFPWQAK.M                          |

|      |        |                             |      |       |       |     |        |          |                       |       |           |                                                      |
|------|--------|-----------------------------|------|-------|-------|-----|--------|----------|-----------------------|-------|-----------|------------------------------------------------------|
| 694  | P00738 | Haptoglobin                 | 6.13 | 45861 | 18/78 | 33% | 163/56 | Secreted | Inflammatory response | 2.07  | 0.00047   | K.LRTEGDGVYTLNNEK.Q<br>R.ILGGHLDK.G                  |
| 712  | P00738 | Haptoglobin                 | 6.13 | 45861 | 24/78 | 41% | 227/56 | Secreted | Inflammatory response | 3.01  | 0.00016   | K.QWINKAVGDK.L+Gln->pyro-Glu(N-term)<br>R.ILGGHLDK.G |
| 306  | P00738 | Haptoglobin                 | 6.13 | 45861 | 15/52 | 26% | 136/56 | Secreted | Inflammatory response | 1.53  | 0.029     | R.ILGGHLDK.G<br>K.GSFPWQAK.M                         |
| 606  | P00738 | Haptoglobin                 | 6.13 | 45861 | 16/40 | 30% | 139/56 | Secreted | Inflammatory response | 8.42  | 0.000043  | R.ILGGHLDK.G<br>K.GSFPWQAK.M                         |
| 612  | P00738 | Haptoglobin                 | 6.13 | 45861 | 19/62 | 32% | 171/56 | Secreted | Inflammatory response | 1.92  | 0.0028    | R.ILGGHLDK.G<br>K.GSFPWQAK.M                         |
| 648  | P00738 | Haptoglobin                 | 6.13 | 45861 | 16/47 | 30% | 155/56 | Secreted | Inflammatory response | 1.86  | 0.049     | R.ILGGHLDK.G<br>K.GSFPWQAK.M                         |
| 670  | P00738 | Haptoglobin                 | 6.13 | 45861 | 19/81 | 32% | 149/56 | Secreted | Inflammatory response | 6.47  | 0.0000032 | R.ILGGHLDK.G<br>K.GSFPWQAK.M                         |
| 682  | P00738 | Haptoglobin                 | 6.13 | 45861 | 23/70 | 35% | 217/56 | Secreted | Inflammatory response | 4.86  | 0.000014  | R.ILGGHLDK.G<br>K.GSFPWQAK.M                         |
| 684  | P00738 | Haptoglobin                 | 6.13 | 45861 | 21/60 | 35% | 175/56 | Secreted | Inflammatory response | 2.48  | 0.012     | R.ILGGHLDK.G<br>K.GSFPWQAK.M                         |
| 691  | P00738 | Haptoglobin                 | 6.13 | 45861 | 18/85 | 34% | 135/56 | Secreted | Inflammatory response | 3.3   | 0.000034  | R.ILGGHLDK.G<br>K.GSFPWQAK.M                         |
| 698  | P00738 | Haptoglobin                 | 6.13 | 45861 | 19/64 | 35% | 142/56 | Secreted | Inflammatory response | 1.3   | 0.019     | R.ILGGHLDK.G<br>K.GSFPWQAK.M                         |
| 719  | P00738 | Haptoglobin                 | 6.13 | 45861 | 20/60 | 38% | 180/56 | Secreted | Inflammatory response | 4.98  | 0.000049  | R.ILGGHLDK.G<br>K.GSFPWQAK.M                         |
| 721  | P00738 | Haptoglobin                 | 6.13 | 45861 | 18/64 | 30% | 144/56 | Secreted | Inflammatory response | 2.18  | 0.00036   | R.ILGGHLDK.G<br>K.GSFPWQAK.M                         |
| 724  | P00738 | Haptoglobin                 | 6.13 | 45861 | 21/47 | 38% | 213/56 | Secreted | Inflammatory response | 4.67  | 0.000054  | R.ILGGHLDK.G<br>K.GSFPWQAK.M                         |
| 742  | P00738 | Haptoglobin                 | 6.13 | 45861 | 13/44 | 29% | 120/56 | Secreted | Inflammatory response | 1.87  | 0.0019    | R.ILGGHLDK.G<br>K.GSFPWQAK.M                         |
| 1187 | P00738 | Haptoglobin                 | 6.13 | 45861 | 7/35  | 11% | 65/56  | Secreted | Inflammatory response | 31.94 | 0.000067  | R.YQCK.N<br>K.NYYK.L                                 |
| 739  | P00739 | Haptoglobin-related protein | 6.63 | 39518 | 8/38  | 18% | 73/56  | Secreted | Inflammatory response | 1.79  | 0.042     | K.NYYR.L<br>K.QWINKAVGDK.L                           |
| 725  | P00739 | Haptoglobin-related protein | 6.63 | 39518 | 11/33 | 23% | 110/56 | Secreted | Inflammatory response | 2.81  | 0.001     | K.NYYR.L<br>R.ILGGHLDK.G                             |
| 756  | P00739 | Haptoglobin-related protein | 6.63 | 39518 | 10/33 | 24% | 133/56 | Secreted | Inflammatory response | 2.19  | 0.02      | K.NYYR.L<br>R.ILGGHLDK.G                             |
| 160  | P02790 | Hemopexin                   | 6.55 | 52385 | 17/69 | 22% | 138/56 | Secreted | Transport             | 1.7   | 0.048     | K.GEFVWK.S<br>K.SHKWDR.E                             |
| 183  | P02790 | Hemopexin                   | 6.55 | 52385 | 19/52 | 25% | 154/56 | Secreted | Transport             | 1.89  | 0.0015    | K.GEFVWK.S<br>K.SHKWDR.E                             |
| 206  | P02790 | Hemopexin                   | 6.55 | 52385 | 24/78 | 40% | 222/56 | Secreted | Transport             | 1.62  | 0.012     | K.GEFVWK.S<br>K.SHKWDR.E                             |

|      |        |                           |      |       |       |     |        |          |                 |       |         |                                                    |
|------|--------|---------------------------|------|-------|-------|-----|--------|----------|-----------------|-------|---------|----------------------------------------------------|
| 226  | P02790 | Hemopexin                 | 6.55 | 52385 | 19/54 | 38% | 161/56 | Secreted | Transport       | 1.58  | 0.0028  | K.NFPSPVDAAFR.Q<br>R.QGHNSVFLIK.G+Gln->pyro-Glu(N- |
| 237  | P02790 | Hemopexin                 | 6.55 | 52385 | 15/41 | 38% | 132/56 | Secreted | Transport       | 1.36  | 0.014   | K.SHKWDR.E<br>K.NFPSPVDAAFR.Q                      |
| 352  | P01876 | Ig alpha-1 chain C region | 6.08 | 38486 | 11/45 | 32% | 143/56 | Secreted | Immune response | -1.31 | 0.04    | K.SVTCHVK.H<br>R.DASGVFTFTWPSSGK.S                 |
| 360  | P01876 | Ig alpha-1 chain C region | 6.08 | 38486 | 11/44 | 32% | 124/56 | Secreted | Immune response | -1.31 | 0.029   | K.SVTCHVK.H<br>R.DASGVFTFTWPSSGK.S                 |
| 376  | P01876 | Ig alpha-1 chain C region | 6.08 | 38486 | 11/61 | 28% | 114/56 | Secreted | Immune response | -1.35 | 0.048   | K.SVTCHVK.H<br>R.DASGVFTFTWPSSGK.S                 |
| 384  | P01876 | Ig alpha-1 chain C region | 6.08 | 38486 | 9/36  | 26% | 83/56  | Secreted | Immune response | 1.41  | 0.016   | K.SVTCHVK.H<br>R.DASGVFTFTWPSSGK.S                 |
| 526  | P01857 | Ig gamma-1 chain C region | 8.46 | 36596 | 9/31  | 28% | 104/56 | Secreted | Immune response | -2.35 | 0.0016  | K.GPSVFPLAPSSK.S<br>K.STSGGTAALGCLVK.D             |
| 527  | P01857 | Ig gamma-1 chain C region | 8.46 | 36596 | 9/31  | 28% | 104/56 | Secreted | Immune response | -2.14 | 0.003   | K.GPSVFPLAPSSK.S<br>K.STSGGTAALGCLVK.D             |
| 529  | P01857 | Ig gamma-1 chain C region | 8.46 | 36596 | 9/21  | 22% | 101/56 | Secreted | Immune response | -2.07 | 0.0011  | K.GPSVFPLAPSSK.S<br>K.STSGGTAALGCLVK.D             |
| 1199 | P01857 | Ig gamma-1 chain C region | 8.46 | 36596 | 11/66 | 30% | 85/56  | Secreted | Immune response | -2.82 | 0.00037 | K.GPSVFPLAPSSK.S<br>K.STSGGTAALGCLVK.D             |
| 534  | P01859 | Ig gamma-2 chain C region | 7.66 | 36505 | 10/66 | 32% | 90/56  | Secreted | Immune response | -2.65 | 0.0012  | K.GPSVFPLAPCSR.S<br>R.STSESTAALGCLVK.D             |
| 512  | P01860 | Ig gamma-3 chain C region | 8.23 | 42287 | 10/55 | 22% | 79/56  | Secreted | Immune response | -2.53 | 0.001   | K.GPSVFPLAPCSR.S<br>R.STSGGTAALGCLVK.D             |
| 1023 | P01834 | Ig kappa chain C region   | 5.58 | 11773 | 5/47  | 57% | 69/56  | Secreted | Immune response | -1.63 | 0.018   | -TVAAPSVFIFPPSDEQLK.S<br>K.DSTYSLSTLTLSK.A         |
| 939  | P01834 | Ig kappa chain C region   | 5.58 | 11773 | 7/98  | 91% | 113/56 | Secreted | Immune response | -1.44 | 0.031   | -TVAAPSVFIFPPSDEQLK.S<br>K.SGTASVVCLLNNFYPR.E      |
| 968  | P01834 | Ig kappa chain C region   | 5.58 | 11773 | 6/56  | 72% | 108/56 | Secreted | Immune response | -1.69 | 0.01    | -TVAAPSVFIFPPSDEQLK.S<br>K.SGTASVVCLLNNFYPR.E      |
| 1002 | P01834 | Ig kappa chain C region   | 5.58 | 11773 | 6/72  | 78% | 100/56 | Secreted | Immune response | -1.51 | 0.0088  | -TVAAPSVFIFPPSDEQLK.S<br>K.SGTASVVCLLNNFYPR.E      |
| 1005 | P01834 | Ig kappa chain C region   | 5.58 | 11773 | 6/36  | 72% | 85/56  | Secreted | Immune response | -1.56 | 0.043   | -TVAAPSVFIFPPSDEQLK.S<br>K.SGTASVVCLLNNFYPR.E      |
| 1012 | P01834 | Ig kappa chain C region   | 5.58 | 11773 | 6/42  | 72% | 90/56  | Secreted | Immune response | -1.73 | 0.01    | -TVAAPSVFIFPPSDEQLK.S<br>K.SGTASVVCLLNNFYPR.E      |
| 1027 | P01834 | Ig kappa chain C region   | 5.58 | 11773 | 7/57  | 84% | 87/56  | Secreted | Immune response | -1.88 | 0.037   | -TVAAPSVFIFPPSDEQLK.S<br>K.SGTASVVCLLNNFYPR.E      |
| 1201 | P01834 | Ig kappa chain C region   | 5.58 | 11773 | 6/48  | 72% | 100/56 | Secreted | Immune response | -1.64 | 0.0059  | -TVAAPSVFIFPPSDEQLK.S<br>K.SGTASVVCLLNNFYPR.E      |
| 996  | P01834 | Ig kappa chain C region   | 5.58 | 11773 | 6/73  | 76% | 63/56  | Secreted | Immune response | -1.66 | 0.001   | -TVAAPSVFIFPPSDEQLK.S<br>K.VDNALQSGNSQESVTEQDSK.D  |
| 1018 | P01834 | Ig kappa chain C region   | 5.58 | 11773 | 5/96  | 63% | 58/56  | Secreted | Immune response | -1.86 | 0.0065  | -TVAAPSVFIFPPSDEQLK.S<br>K.VDNALQSGNSQESVTEQDSK.D  |

|      |        |                                        |      |        |       |     |        |                |                             |       |          |                                                                            |
|------|--------|----------------------------------------|------|--------|-------|-----|--------|----------------|-----------------------------|-------|----------|----------------------------------------------------------------------------|
| 928  | P01834 | Ig kappa chain C region                | 5.58 | 11773  | 5/16  | 50% | 82/56  | Secreted       | Immune response             | -1.67 | 0.0026   | - .TVAAPSVFIFPPSDEQLK.S<br>R.EAKVQWK.V+Glu->pyro-Glu(N-termE)              |
| 981  | P01834 | Ig kappa chain C region                | 5.58 | 11773  | 5/36  | 57% | 59/56  | Secreted       | Immune response             | -1.56 | 0.013    | - .TVAAPSVFIFPPSDEQLK.S<br>R.EAKVQWK.V+Glu->pyro-Glu(N-termE)              |
| 1010 | P01834 | Ig kappa chain C region                | 5.58 | 11773  | 7/55  | 83% | 88/56  | Secreted       | Immune response             | -1.63 | 0.0081   | - .TVAAPSVFIFPPSDEQLK.S<br>R.EAKVQWK.V+Glu->pyro-Glu(N-termE)              |
| 1016 | P01834 | Ig kappa chain C region                | 5.58 | 11773  | 5/43  | 48% | 72/56  | Secreted       | Immune response             | -2.21 | 0.042    | - .TVAAPSVFIFPPSDEQLK.S<br>R.EAKVQWK.V+Glu->pyro-Glu(N-termE)              |
| 931  | P0CG05 | Ig kappa chain C region                | 6.92 | 11458  | 5/42  | 55% | 81/56  | Secreted       | Immune response             | -2.6  | 0.027    | K.AAPSVTLFPPSSEELQANK.A<br>K.ADSSPVK.A                                     |
| 1021 | P01834 | Ig kappa chain C region                | 5.58 | 11773  | 6/27  | 64% | 89/56  | Secreted       | Immune response             | -1.5  | 0.014    | - .TVAAPSVFIFPPSDEQLK.S<br>R.EAKVQWK.V+Glu->pyro-Glu(N-termE)              |
| 993  | P01623 | Ig kappa chain V-III region<br>WOL     | 9.07 | 11853  | 7/100 | 62% | 72/56  | Secreted       | Immune response             | -1.52 | 0.011    | - .EIVLTQSPGTLSLSPGER.A<br>R.ATLSCR.A                                      |
| 1011 | P01623 | Ig kappa chain V-III region<br>WOL     | 9.07 | 11853  | 7/67  | 62% | 71/56  | Secreted       | Immune response             | -1.83 | 0.014    | - .EIVLTQSPGTLSLSPGER.A+Glu->pyro-<br>Glu(N-termE)<br>R.ATLSCR.A           |
| 1004 | P01623 | Ig kappa chain V-III region<br>WOL     | 9.07 | 11853  | 8/78  | 62% | 92/56  | Secreted       | Immune response             | -1.53 | 0.011    | EIVLTQSPGTLSLSPGER.A+Glu->pyro-<br>Glu(N-termE)<br>- .EIVLTQSPGTLSLSPGER.A |
| 983  | P01623 | Ig kappa chain V-III region<br>WOL     | 9.07 | 11853  | 6/77  | 45% | 82/56  | Secreted       | Immune response             | -1.47 | 0.013    | R.ATLSCR.A<br>R.LLIYGASSR.A                                                |
| 1190 | Q6ZVT0 | Inactive polyglycylase<br>TTLL10       | 9.36 | 75792  | 7/31  | 8%  | 71/56  | Secreted       | Unknown                     | 24.72 | 0.000018 | R.GKRPR.I<br>R.VLRMEEFFPETYR.L                                             |
| 232  | P01042 | Kininogen-1                            | 6.34 | 72996  | 18/57 | 25% | 137/56 | Secreted       | Inflammatory<br>response    | 1.37  | 0.0075   | K.YNSQNSNNQFVLYR.I<br>K.TVGSDTFYSFK.Y                                      |
| 613  | P02750 | Leucine-rich alpha-2-<br>glycoprotein  | 6.45 | 38382  | 13/33 | 28% | 138/56 | Secreted       | Inflammatory<br>response    | 2.06  | 0.0091   | - .MSSWSR.Q+Acetyl(ProteinN-term)<br>K.DCQVFR.S                            |
| 646  | P02750 | Leucine-rich alpha-2-<br>glycoprotein  | 6.45 | 38382  | 13/55 | 31% | 113/56 | Secreted       | Inflammatory<br>response    | 2.07  | 0.0028   | - .MSSWSR.Q+Acetyl(ProteinN-term)<br>K.DCQVFR.S                            |
| 580  | P02750 | Leucine-rich alpha-2-<br>glycoprotein  | 6.45 | 38382  | 12/38 | 27% | 134/56 | Secreted       | Inflammatory<br>response    | 2.33  | 0.00076  | K.DCQVFR.S<br>R.VLDLTR.N                                                   |
| 594  | P02750 | Leucine-rich alpha-2-<br>glycoprotein  | 6.45 | 38382  | 12/53 | 29% | 103/56 | Secreted       | Inflammatory<br>response    | 4.12  | 0.0011   | K.DCQVFR.S<br>R.VLDLTR.N                                                   |
| 630  | P02750 | Leucine-rich alpha-2-<br>glycoprotein  | 6.45 | 38382  | 12/25 | 27% | 147/56 | Secreted       | Inflammatory<br>response    | 2     | 0.0055   | K.DCQVFR.S<br>R.VLDLTR.N                                                   |
| 678  | P02750 | Leucine-rich alpha-2-<br>glycoprotein  | 6.45 | 38382  | 12/40 | 25% | 118/56 | Secreted       | Inflammatory<br>response    | 2.46  | 0.0026   | K.DCQVFR.S<br>R.VLDLTR.N                                                   |
| 364  | Q14980 | Nuclear mitotic apparatus<br>protein 1 | 5.63 | 239199 | 23/51 | 10% | 101/56 | Nucleus matrix | Cell<br>differentiation     | -1.33 | 0.045    | R.KHPSSPECLVSAQK.V<br>K.HPSSPECLVSAQK.V                                    |
| 26   | P05155 | Plasma protease C1 inhibitor           | 6.09 | 55347  | 7/10  | 13% | 91/56  | Secreted       | Coagulation                 | 1.86  | 0.018    | K.LYHAFSAMK.K+Oxidation(M)<br>K.DFTCVHQALK.G                               |
| 278  | Q9HAH7 | Probable fibrosin-1                    | 9.96 | 48529  | 12/73 | 21% | 92/56  | Secreted       | Fibroblast<br>proliferation | 1.59  | 0.0024   | K.QLVLK.A<br>K.EQLSLDDR.F+Glu->pyro-Glu(N-termE)                           |
| 172  | P02787 | Serotransferrin                        | 6.81 | 79294  | 25/58 | 31% | 203/56 | Secreted       | Transport                   | 1.35  | 0.031    | R.WCAVSEHEATK.C<br>K.CQSFR.D                                               |



|      |        |                                                      |      |       |        |     |        |           |                       |       |         |                                                 |
|------|--------|------------------------------------------------------|------|-------|--------|-----|--------|-----------|-----------------------|-------|---------|-------------------------------------------------|
| 275  | P02768 | Serum albumin                                        | 5.92 | 71317 | 42/100 | 49% | 301/56 | Secreted  | Transport             | -1.58 | 0.018   | K.SEVAHR.F<br>R.FKDLGEENFK.A                    |
| 279  | P02768 | Serum albumin                                        | 5.92 | 71317 | 23/73  | 33% | 157/56 | Secreted  | Transport             | -1.87 | 0.023   | K.SEVAHR.F<br>R.FKDLGEENFK.A                    |
| 290  | P02768 | Serum albumin                                        | 5.92 | 71317 | 28/83  | 35% | 183/56 | Secreted  | Transport             | -1.37 | 0.017   | K.SEVAHR.F<br>R.FKDLGEENFK.A                    |
| 291  | P02768 | Serum albumin                                        | 5.92 | 71317 | 20/47  | 32% | 170/56 | Secreted  | Transport             | -1.77 | 0.0051  | K.WVTFISLLFLFSSAYS.R.G<br>R.FKDLGEENFK.A        |
| 255  | P02768 | Serum albumin                                        | 5.92 | 71317 | 20/96  | 23% | 82/56  | Secreted  | Transport             | 1.7   | 0.034   | R.DAHKSEVAHR.F<br>K.SEVAHR.F                    |
| 263  | P02768 | Serum albumin                                        | 5.92 | 71317 | 31/76  | 41% | 233/56 | Secreted  | Transport             | 2.62  | 0.046   | R.DAHKSEVAHR.F<br>K.SEVAHR.F                    |
| 300  | P02768 | Serum albumin                                        | 5.92 | 71317 | 31/95  | 34% | 175/56 | Secreted  | Transport             | -1.7  | 0.035   | R.DAHKSEVAHR.F<br>K.SEVAHR.F                    |
| 313  | P02768 | Serum albumin                                        | 5.92 | 71317 | 24/91  | 27% | 127/56 | Secreted  | Transport             | -1.74 | 0.0022  | R.DAHKSEVAHR.F<br>K.SEVAHR.F                    |
| 314  | P02768 | Serum albumin                                        | 5.92 | 71317 | 31/83  | 39% | 224/56 | Secreted  | Transport             | -1.82 | 0.0011  | R.DAHKSEVAHR.F<br>K.SEVAHR.F                    |
| 247  | P02768 | Serum albumin                                        | 5.92 | 71317 | 19/57  | 28% | 136/56 | Secreted  | Transport             | -1.48 | 0.014   | R.DAHKSEVAHR.F<br>R.FKDLGEENFK.A                |
| 264  | P02768 | Serum albumin                                        | 5.92 | 71317 | 26/56  | 38% | 222/56 | Secreted  | Transport             | 2.7   | 0.0058  | R.DAHKSEVAHR.F<br>R.FKDLGEENFK.A                |
| 271  | P02768 | Serum albumin                                        | 5.92 | 71317 | 17/62  | 22% | 115/56 | Secreted  | Transport             | 1.85  | 0.0045  | R.FKDLGEENFK.A<br>K.LVNEVTEFAK.T                |
| 955  | P02743 | Serum amyloid P-component                            | 6.1  | 25485 | 5/9    | 20% | 75/56  | Secreted  | Transport             | -1.41 | 0.021   | K.VFVFPR.E<br>R.AYSDLSR.A                       |
| 1036 | Q9P031 | Thyroid transcription factor 1-associated protein 26 | 9.89 | 28880 | 15/93  | 34% | 70/56  | Nucleus   | Transcription control | -1.53 | 0.0059  | -.MAPVR.R+Acetyl(ProteinN-term)<br>-.MAPVRR.S   |
| 1183 | P02766 | Transthyretin                                        | 5.52 | 15991 | 9/32   | 57% | 119/56 | Secreted  | Transport             | -1.58 | 0.0064  | K.CPLMVK.V<br>K.CPLMVK.V+Oxidation              |
| 1170 | P02766 | Transthyretin                                        | 5.52 | 15991 | 9/70   | 46% | 98/56  | Secreted  | Transport             | -1.39 | 0.02    | K.CPLMVK.V<br>K.CPLMVK.V+Oxidation(M)           |
| 1194 | P28289 | Tropomodulin-1                                       | 5.03 | 40658 | 7/53   | 19% | 58/56  | Cytoplasm | Cytoskeleton          | 16.99 | 0.00015 | -.MSYRR.E+Acetyl<br>K.DREDLVPYTGEK.R            |
| 496  | P02774 | Vitamin D-binding protein                            | 5.4  | 54526 | 20/61  | 37% | 166/56 | Secreted  | Transport             | 2.08  | 0.0017  | K.EFSLGK.E<br>K.EDFTSLSLVLYSR.K                 |
| 444  | P02774 | Vitamin D-binding protein                            | 5.4  | 54526 | 18/59  | 32% | 127/56 | Secreted  | Transport             | 1.74  | 0.005   | K.EFSLGK.E<br>R.KFPSGTFEQVSQLVK.E               |
| 489  | P02774 | Vitamin D-binding protein                            | 5.4  | 54526 | 24/71  | 35% | 156/56 | Secreted  | Transport             | 1.46  | 0.033   | R.GRDYEK.N<br>K.EFSLGK.E+Glu->pyro-Glu(N-termE) |
| 696  | P25311 | Zinc-alpha-2-glycoprotein                            | 5.71 | 34465 | 22/56  | 54% | 207/56 | Secreted  | Transcription control | 1.33  | 0.0094  | R.YSLTYIYTGLSK.H<br>K.HVEDVPAFQALGSLNDLQFFR.Y   |
| 595  | P25311 | Zinc-alpha-2-glycoprotein                            | 5.71 | 34465 | 23/72  | 47% | 213/56 | Secreted  | Transcription control | 2.45  | 0.00014 | R.YSLTYIYTGLSK.H<br>R.YNSKDR.K                  |

|     |        |                           |      |       |       |     |        |          |                          |      |        |                                |
|-----|--------|---------------------------|------|-------|-------|-----|--------|----------|--------------------------|------|--------|--------------------------------|
| 687 | P25311 | Zinc-alpha-2-glycoprotein | 5.71 | 34465 | 25/67 | 52% | 238/56 | Secreted | Transcription<br>control | 1.42 | 0.0081 | R.YSLTYIYTGLSK.H<br>R.YNSKDR.K |
| 703 | P25311 | Zinc-alpha-2-glycoprotein | 5.71 | 34465 | 23/53 | 47% | 198/56 | Secreted | Transcription<br>control | 1.57 | 0.0028 | R.YSLTYIYTGLSK.H<br>R.YNSKDR.K |

---
